# Supplementary material
Source: Elsevier journal article supplement (https://www.sciencedirect.com/science/article/pii/S1130239921000031)
Supplement: mmc1 [file S1130239921000031:mmc1.doc]

| **Autor/es**  **Año**  **País** | **Tipo de estudio**  **Nivel de evidencia y grado de recomendación** | **Tipo de UCI** | **Variable principal** | **Resultados** | **Protocolo/**  **algoritmo de movilización precoz (<5 días estancia UCI)** | **Variables para guiar progresión en la movilización (consciencia)** | **Variables para guiar la progresión en la movilización (función física)** | **Usan aparatos de soporte** | **Indica tiempos para cada ejercicio** |
| --- | --- | --- | --- | --- | --- | --- | --- | --- | --- |
| Olkowski BF et al.  2013  USA | Estudio Prepost  2B | Neurocríticos (pacientes con hemorragia subaracnoidea) | Eventos adversos. Sesiones de programa de movilización temprana. Sesiones donde se cumplieron los criterios para participar y razones por las cuales no se cumplieron. | Eventos adversos 5.9% Mortalidad a los 30 días: 0%. Inclusión en el programa de rehabilitación: a les 3.2 días post hemorragia subaracnoidea Media de 11.4 sesiones/paciente Media de 5.4 días hasta la primera movilización fuera de la cama Media de 10.7 días para deambular más de 50 pies (15.24 minutos) | Si (tabla 1) + criterios de seguridad para participar en la movilización (apéndice 1) | No | No | No | 30-60 minutos día en total |
| Chavez J et al.  2015  USA | Estudio de casos Proyecto de mejora de calidad  3D | Cardiovascular/Cardiotorácica. Pacientes con ECMO y DAV | Descripción de dos casos a los que se les ha aplicado el protocolo de movilización temprana y progresiva | Paciente A: Actividad fuera de la cama el día 10 estancia UCI; caminar de la cama a la silla el día 12. Paciente B: Inicia la movilización el día 22; el día 26 consigue estar de pie durante 45 segundos 3 veces por día | Si (figura 2) + criterios de inclusión (figura 1) | No | Fuerza muscular pero no indica qué test | No | Si |
| Morris PE et al.  2008  USA | Estudio de cohortes prospectivo  2C | UCI médica. Pacientes con fallo respiratorio agudo | % de pacientes que reciben terapia física | No hubo complicaciones Los pacientes que recibieron el protocolo consiguieron salir de la cama antes. Disminuyó la estancia en UCI Disminuyó la estancia en el hospital. El coste no fue mayor en los pacientes a los que se aplicó el protocolo | Si (figura 1) | Indica niveles de consciencia pero no variable para medirla | Fuerza muscular contra gravedad | No | Si |
| **Autor/es**  **Año**  **País** | **Tipo de estudio**  **Nivel de evidencia y grado de recomendación** | **Tipo de UCI** | **Variable principal** | **Resultados** | **Protocolo/**  **algoritmo de movilización precoz (<5 días estancia UCI)** | **Variables para guiar progresión en la movilización (consciencia)** | **Variables para guiar la progresión en la movilización (función física)** | **Usan aparatos de soporte** | **Indica tiempos para cada ejercicio** |
| Engel HJ et al.  2013  USA | Estudio observacional retrospectivo. Proyecto de mejora de calidad  2D | UCI médico-quirúrgica | Número de pacientes que reciben terapia física. Momento en el que se inicia la movilización temprana. Días de estancia en UCI. % de pacientes a los que se da el alta a domicilio. | Aumenta el número de pacientes a los que se aplica la movilización Disminuyen los días de inicio de la movilización. Disminuye estancia en UCI. | Si (figura 1) | RASS y CAM-ICU | No | No | No |
| Pohlman MC et al.  2010  USA | ECA multicéntrico  1A | UCI médica. Pacientes con VM | % de días en los que se aplicó el protocolo de movilización temprana. Tipo de terapia alcanzada. Interrupción de la terapia. | La terapia se proporcionó en el 90% de los días  El 69% de los pacientes se sentaron al borde de la cama. El 33% fueron transferidos a la silla. El 33% se pusieron de pie. Deambularon el 15% La terapia se interrumpió prematuramente en el 4% de las sesiones, por asincronía paciente-ventilador y agitación. | Si (figura 1) + contraindica-ciones a la movilización (apéndice A) | Seguir órdenes | No | No | No |
| **Autor/es**  **Año**  **País** | **Tipo de estudio**  **Nivel de evidencia y grado de recomendación** | **Tipo de UCI** | **Variable principal** | **Resultados** | **Protocolo/**  **algoritmo de movilización precoz (<5 días estancia UCI)** | **Variables para guiar progresión en la movilización (consciencia)** | **Variables para guiar la progresión en la movilización (función física)** | **Usan aparatos de soporte** | **Indica tiempos para cada ejercicio** |
| Eggmann S et al.  2018  Suiza | ECA  2C | UCI mixta | Función física: test de la marcha de 6 minutos y Funcional Independence Mesure (FIM) al alta hospital | Antes de las 48 horas posteriores al ingreso: el 97% de los participantes todavía estaban ventilados y el 68% con inotrópicos.  El grupo experimental (n = 58) recibió más fisioterapia y tuvo menos días con sedación. Eventos adversos: 0,6%.  No hubo diferencias significativas entre grupos en el test de la marcha. | Si (S1 figura) | Seguir órdenes | No | Bicicleta | Si |
| Fossat G, et al.  2018  Francia | ECA  1A | UCI Médico-quirúrgica | Función muscular: testado manual (MRC-SS) alta UCI | La mediana en el MRC al alta de UCI no tubo diferencias entre ambos grupos (48 [IQR,29 a 58] en el grupo intervención y 51 [IQR, 37 a 58] en el control, p=0.28). La mediana en la ICU Mobility Scale (IMS) al alta de UCI era de 6 en ambos grupos (IQR 3 a 6) P=0.52.  No hubo diferencias significativas en los resultados secundarios en el alta de UCI ni a los 6 meses. | Si (figura 1) | Indica niveles de consciencia pero no variable para medirla | MRC | Bicicleta + electro-estimulación | Si en el protocolo escrito, no en la figura |
| **Autor/es**  **Año**  **País** | **Tipo de estudio**  **Nivel de evidencia y grado de recomendación** | **Tipo de UCI** | **Variable principal** | **Resultados** | **Protocolo/**  **algoritmo de movilización precoz (<5 días estancia UCI)** | **Variables para guiar progresión en la movilización (consciencia)** | **Variables para guiar la progresión en la movilización (función física)** | **Usan aparatos de soporte** | **Indica tiempos para cada ejercicio** |
| Bahouth MN et al.  2018  USA | Cuasi-experimental  3D | Neurocríticos (hemorragia intracerebral) | Tiempo a la primera movilización | No aumentó el número de eventos adversos y se asoció con una mayor probabilidad de movilización en la primera semana. | Si (figura 1) | Glasgow | No | Bicicleta | No |
| Hickmann CE et al.  2018  Bélgica | ECA  1A | No especificado | Biopsia del músculo. Función muscular: testado manual (MRC-SS) | Menos pérdida de masa muscular en grupo intervención | Si (video sobre el uso de la bicicleta) | No | No | Bicicleta | Si |
| Sarfati C et al.  2018  Francia | ECA  1A | UCI cardiológica | Función muscular: testado manual (MRC-SS) | Sin diferencias en el valor de MRC Mejor correlación entre MRC basal y MRC al alta en grupo intervención y mayor nivel de movilización conseguido | Si (figura 2) | RASS | No | Tabla de verticali-  zación | Si |
| Hodgson CL et al.  2016  Australia | Estudio piloto ECA  1B | Multicéntrico: UCIs médico-quirúrgicas y traumatológicas. Pacientes con VM | Función física: ICU Mobility Scale (IMS). | El máximo nivel de actividad utilizando ICU Mobility Scale (IMS) fue significativamente mayor en el grupo intervención.  La proporción de pacientes que caminaron en la UCI fue casi el doble con la movilización temprana dirigida a objetivos. No hubo diferencia en los días de estancia hospitalaria total. No hubo eventos adversos. | Si (figura 1) | No | IMS | No | Si |
| **Autor/es**  **Año**  **País** | **Tipo de estudio**  **Nivel de evidencia y grado de recomendación** | **Tipo de UCI** | **Variable principal** | **Resultados** | **Protocolo/**  **algoritmo de movilización precoz (<5 días estancia UCI)** | **Variables para guiar progresión en la movilización (consciencia)** | **Variables para guiar la progresión en la movilización (función física)** | **Usan aparatos de soporte** | **Indica tiempos para cada ejercicio** |
| Hanekom S et al.  2011  Sudáfrica | Revisión sistemática  2B | UCI. Pacientes sometidos a VM | Pregunta de estudio: ¿es seguro y efectivo movilizar pacientes intubados durante el ingreso en UCI? | Se establece un algoritmo mediante el proceso Delphi. Los resultados se agruparon en 3 categorías: Categoría A: valoración y tratamiento del paciente inconsciente; Categoría B: paciente estable y colaborador; y Categoría C: paciente estable y con enfermedad crítica crónica. | Si (apéndices E1 a E4 + criterios de seguridad) | Indica niveles de consciencia pero no variable para medirla | No | No | No |
| Perme C et al.  2009  USA | Revisión de la literatura. Opinión de expertos  4D | UCI. Pacientes sometidos a VM | Intervención de movilización en 4 fases | Programa de movilización temprana y caminar que se divide en 4 fases. Cada fase incluye pautas sobre el posicionamiento, ejercicios terapéuticos, transferencias, colocarse de pie y duración y frecuencia de las sesiones de movilidad. Se proporcionan criterios para avanzar a la siguiente fase. | Si (tabla 2 y 3 + criterios de seguridad) | No | No | No | Si |
| Schujmann D et al.  2018  Brasil | ECA  1A | UCI general | Estado funcional al alta de UCI (Barthel y IMS) | El protocolo consta de cinco fases, que van desde terapias pasivas hasta caminar y subiendo escaleras. No muestra los resultados, únicamente el protocolo | Si (figura 1) | Seguir órdenes | MRC | Bicicleta | Si |
| **Autor/es**  **Año**  **País** | **Tipo de estudio**  **Nivel de evidencia y grado de recomendación** | **Tipo de UCI** | **Variable principal** | **Resultados** | **Protocolo/**  **algoritmo de movilización precoz (<5 días estancia UCI)** | **Variables para guiar progresión en la movilización (consciencia)** | **Variables para guiar la progresión en la movilización (función física)** | **Usan aparatos de soporte** | **Indica tiempos para cada ejercicio** |
| Mc Williams D et al.  2016  Reino Unido | Pre-post  2B | UCI general, neurológica y traumatológica. Pacientes sometidos a VM y con riesgo de debilidad adquirida | Tiempo a la primera movilización | Tras la introducción del Sara Combilizer, el tiempo necesario para iniciar la movilización se redujo significativamente No hubo diferencias significativas en el tiempo de terapia entre los grupos, la estancia en UCI o la duración de la estancia hospitalaria. | Si (figura 3) | Indica niveles de consciencia pero no variable para medirla | No | Tabla de verticaliza-ción *Sara Combilizer®* | Si |
| Kimawi I et al.  2017  USA | Pre-post. Proyecto de mejora continua de calidad  2B | UCI médica | Tiempo que aguantan en bicicleta y nivel de resistencia. Eventos adversos | Eventos adversos: 1 vs 4. El evento pre fue retirada de catéter arterial. Los 4 en el post fueron 1 desaturación, 2 hipertensiones y 1 arritmia. Todos ellos transitorios y no se requirió intervención. Sesiones de movilización más largas en el post. | Si (figura 1) | No | No | Bicicleta | Si |
| Moyer M et al.  2017  USA | Pre-post  2B | UCI neurocríticos (hemorragia subacracnoidea + drenaje ventricular externo) | Tiempo para la primera movilización, estancia en UCI, alta a domicilio. Eventos adversos | No se llevaron a cabo debido al empeoramiento del examen neurológico (10), inestabilidad respiratoria (2), inestabilidad hemodinámica (2), inestabilidad médica (3) y solicitud del proveedor (1). No hubo diferencias en días de estancia entre los grupos.  La movilización fue más precoz en el grupo intervención | Si (figura 1) | No | No | No | No |
| **Autor/es**  **Año**  **País** | **Tipo de estudio**  **Nivel de evidencia y grado de recomendación** | **Tipo de UCI** | **Variable principal** | **Resultados** | **Protocolo/**  **algoritmo de movilización precoz (<5 días estancia UCI)** | **Variables para guiar progresión en la movilización (consciencia)** | **Variables para guiar la progresión en la movilización (función física)** | **Usan aparatos de soporte** | **Indica tiempos para cada ejercicio** |
| Booth K et al.  2016  USA | Pre-post  2B | UCI neuro-trauma | Incidencia de tromboembolismo, días de estancia en hospital y en UCI, mortalidad, días de ventilación mecánica, fallo respiratorio y neumonía. | No eventos adversos y diferencias significativas entre grupos en la incidencia de tromboembolismo | Si (figura 1 + criterios de seguridad) | No | No | No | No |
| Brummel NE, et al.  2014  USA | ECA  1B | UCI médicas y quirúrgicas (pacientes con insuficiencia respiratoria y/o shock séptico, cardiogénico o hemorrágico) | % días paciente que recibe terapia cognitiva y terapia física. Función física: nivel de movilidad (sin escala) y tiempo de cada sesión. | La fisioterapia se administró en el 77% de los pacientes con “manejo habitual” (en un 17% de los días de estudio), en el 95% de los pacientes del grupo de fisioterapia (en un 67% de los días de estudio) y en el 98% de los del grupo “fisioterapia + terapia cognitiva” (en un 75% de los días de estudio). La primera sesión de fisioterapia fue administrada en el tercer día después de la inclusión (en el grupo 1), y al primer día en el grupo 2 y 3.  A los 3 meses, no diferencias en los 3 grupos por lo que respecta al test Tower (funcionalidad), cognición global, movilidad funcional, AVD, AVDI y HRQOL. | Si (figura 1) | RASS | No | No | No |
| **Autor/es**  **Año**  **País** | **Tipo de estudio**  **Nivel de evidencia y grado de recomendación** | **Tipo de UCI** | **Variable principal** | **Resultados** | **Protocolo/**  **algoritmo de movilización precoz (<5 días estancia UCI)** | **Variables para guiar progresión en la movilización (consciencia)** | **Variables para guiar la progresión en la movilización (función física)** | **Usan aparatos de soporte** | **Indica tiempos para cada ejercicio** |
| Thomas K, et al.  2015  Reino Unido | ECA 1B | UCI médico-quirúrgica. Pacientes sometidos a VM | Calidad de vida (SF-36) a los 6 meses alta UCI | No presentan resultados únicamente es el protocolo del ensayo y hacen referencia a que se publicarán más adelante | Si (figuras 2, 3 y 4) | RASS | Escala de Oxford | No | No |
| Kho Me, et al.  2016  Canadá | ECA multicéntrico  1A | UCI médicas y quirúrgicas. Pacientes sometidos a VM | Función muscular: testado manual (MRC-SS) y Función física con Physical function in Intensive Care Test scored (PFIT-s) al despertar, alta UCI y alta hospital | No presentan resultados únicamente es el protocolo del ensayo y hacen referencia a que se publicarán más adelante | Protocolo de uso de la bicicleta: criterios de seguridad y tiempos | No | No | Bicicleta | Si |
| Mc Williams D et al.  2015  Reino Unido | Pre-post. Proyecto de mejora continua de calidad  2C | UCI trauma y neurocríticos. Pacientes sometidos a VM | Función física: Manchester Mobility Score (MMS) | Equipo de rehabilitación de la UCI se asoció con un aumento significativo de la movilidad y esto se asoció con una reducción significativa de los días de estancia en UCI, días de ventilación, días de estancia hospitalaria y mortalidad. La diferencia en la MMS entre los grupos no significativa. | Si (figura 1) | RASS | No | Tabla de verticali-zación | No |
| **Autor/es**  **Año**  **País** | **Tipo de estudio**  **Nivel de evidencia y grado de recomendación** | **Tipo de UCI** | **Variable principal** | **Resultados** | **Protocolo/**  **algoritmo de movilización precoz (<5 días estancia UCI)** | **Variables para guiar progresión en la movilización (consciencia)** | **Variables para guiar la progresión en la movilización (función física)** | **Usan aparatos de soporte** | **Indica tiempos para cada ejercicio** |
| Mah JW et al.  2013  USA | Pre-post  2C | UCI trauma. Pacientes sometidos a VM | Función física: Functional Independence Measure (FIM) | El abordaje empleado acortó los días entre ingreso e interconsulta al fisioterapeuta. Mediana de días entre ingreso y evaluación por parte de fisioterapeuta sin diferencias significativas. En grupo control, mayores puntuaciones FIM en evaluación de cama-silla. El estado del paciente al alta de UCI mejoró con respecto al grupo control. No hubo diferencias al alta del hospital. No se produjeron efectos adversos. | Si (figura 1 y 2) | Indica niveles de consciencia pero no variable para medirla | Fuerza muscular pero no indica qué test | No | Si |
| Johnson JK et al.  2018  USA | Pre-post  2C | UCI cardiovascular | Frecuencia y duración de las sesiones de fisioterapia; función física: Activity Measure for Postacute Care (AM-PAC) | Los pacientes en el post participaron más tiempo en la terapia de movilización. Disminuyeron los días de estancia en UCI. No hubo diferencias en los cambios de nivel de movilidad y destino al alta en función de la necesidad de cuidados. | Si (figura 1) | No | Fuerza muscular contra gravedad | Tabla de verticali-zación | No |
| **Autor/es**  **Año**  **País** | **Tipo de estudio**  **Nivel de evidencia y grado de recomendación** | **Tipo de UCI** | **Variable principal** | **Resultados** | **Protocolo/**  **algoritmo de movilización precoz (<5 días estancia UCI)** | **Variables para guiar progresión en la movilización (consciencia)** | **Variables para guiar la progresión en la movilización (función física)** | **Usan aparatos de soporte** | **Indica tiempos para cada ejercicio** |
| Drolet A, et al.  2013  USA | Cuasi-experimental 2B | UCI médico-quirúrgica y cuidados intermedios | % de pacientes que deambulan | % de pacientes que deambulan aumenta en periodo post (pre 6,2% (12/193) vs post 20,2% (86/426), p<0,001) | Si (apéndice 2) | No | No | No | Si |
| Clark DE, et al.  2013  USA | Estudio de cohortes retrospectivo 2C | UCI traumatológica y quemados | Eventos adversos. Días de VM. Estancia en UCI. Estancia en hospital | Sin eventos adversos; no significativa la disminución de estancia, ni en UCI ni en hospital | Si (figura 1 + contraindica-ciones en tabla 2) | No | No | No | Si |
| Dantas CM, et al.  2012  Brasil | ECA  1B | UCI general. Pacientes sometidos a VM | Función física: testado manual (MRC-SS). Estancia en UCI y hospital | Mejora de la MRC en el grupo intervención sin diferencias en días estancia | Si (figura 1) | Indica niveles de consciencia pero no variable para medirla | MRC | Bicicleta | Si |
| Negro A, et al.  2018  Italia | Estudio observacional prospectivo  2D | UCI general. | Función física: nivel de movilidad sin escala. | Hubo un aumento significativo en la movilización de pacientes sometidos a VM. Todos los eventos (4) fueron resueltos inmediatamente después de detener la movilización sin consecuencias. | Si (tabla 1 y 2) | No | No | No | Si |
| **Autor/es**  **Año**  **País** | **Tipo de estudio**  **Nivel de evidencia y grado de recomendación** | **Tipo de UCI** | **Variable principal** | **Resultados** | **Protocolo/**  **algoritmo de movilización precoz (<5 días estancia UCI)** | **Variables para guiar progresión en la movilización (consciencia)** | **Variables para guiar la progresión en la movilización (función física)** | **Usan aparatos de soporte** | **Indica tiempos para cada ejercicio** |
| Ragland C, et al.  2019  USA | Pre-post  2C | UCI quirúrgica-traumatológica. Pacientes con TCDR | % pacientes incluidos en el nuevo protocolo y nivel de movilidad sin escala | 180 pacientes (31 con TDR) en periodo pre versus 180 pacientes (25 con TDR) en periodo post. Aumentó en un 66,8% la movilidad en el periodo post. | Si (figura 1) | Seguir órdenes | No | No | No |
| Bassett, et al.  2012  USA | Pre-post  2C | Multicéntrico: UCIs médico-quirúrgicas y traumatológicas | Cambios culturales en el equipo y días VM y tiempo con actividad | Disminución de los días VM (3 días pre vs 2.1 días post, p=0,06) | Si (figura 1) | RASS | Fuerza muscular contra gravedad | No | Si |

**Acrónimos**

ECMO (oxigenación por membrana extracorpórea); DAV (dispositivo asistencia ventricular); VM (ventilación mecánica); ECA (ensayo clínico aleatorizado); RASS (Richmond Agitation-Sedations Scale); CAM-ICU (Confusion Assessment Method for the Intensive Care Unit); MRC (Medical Research Council scale); MRC-SS (Medical Research Council scale Sum-Score); AVD (actividades de la vida diaria); AVDI (actividades instrumentales vida diaria); HRQOL (Health-Related Quality of Life); TCDR (terapias continuas de depuración renal)

**Referencias**

Bahouth MN, Power MC, Zink EK, Kozeniewski K, Kumble S, Deluzio S, Urrutia VC, Stevens RD. Safety and Feasibility of a Neuroscience Critical Care Program to Mobilize Patients With Primary Intracerebral Hemorrhage. Arch Phys Med Rehabil. 2018 Jun;99(6):1220-1225.

Bassett RD, Vollman KM, Brandwene L, Murray T. Integrating a multidisciplinary mobility programme into intensive care practice (IMMPTP): A multicenter collaborative. Intensive and Critical Care Nursing. 2012; 28, 88—97

Booth K, Rivet J, Flici R, Harvey E, Hamill M, Hundley D, et al. Progressive Mobility Protocol Reduces Venous Thromboembolism Rate in Trauma Intensive Care Patients: A Quality Improvement Project. J Trauma Nurs. 2016 Sep-Oct;23(5):E3-4.

Brummel NE, Girard TD, Ely EW, Pandharipande PP, Morandi A, Hughes CG, Graves AJ, Shintani A, Murphy E, Work B, Pun BT, Boehm L, Gill TM, Dittus RS, Jackson JC. Feasibility and safety of early combined cognitive and physical therapy for critically ill medical and surgical patients: the Activity and Cognitive Therapy in ICU (ACT-ICU) trial.Intensive Care Med. 2014 Mar;40(3):370-9

Chavez J, Bortolotto SJ, Paulson M, Huntley N, Sullivan B, Babu A. Promotion of progressive mobility activities with ventricular assist and extracorporeal membrane oxygenation devices in a cardiothoracic intensive care unit. Dimens Crit Care Nurs. 2015 Nov-Dec;34(6):348-55.

Clark DE, Lowman JD, Griffin RL, Matthews HM, Reiff DA.Effectiveness of an early mobilization protocol in a trauma and burns intensive care unit: a retrospective cohort study.Phys Ther. 2013 Feb;93(2):186-96.

Dantas CM, Silva PF, Siqueira FH, Pinto RM, Matias S, Maciel C, Oliveira MC, Albuquerque CG, Andrade FM, Ramos FF, França EE. Influence of early mobilization on respiratory and peripheral muscle strength in critically ill patients.Rev Bras Ter Intensiva. 2012 Jun;24(2):173-8

Drolet A, DeJuilio P, Harkless S, Henricks S, Kamin E, Leddy EA, Lloyd JM, Waters C, Williams S.Move to improve: the feasibility of using an early mobility protocol to increase ambulation in the intensive and intermediate care settings.Phys Ther. 2013 Feb;93(2):197-207

Eggmann S, Verra ML, Luder G, Takala J, Jakob SM. Effects of early, combined endurance and resistance training in mechanically ventilated, critically ill patients: A randomised controlled trial. PLoS One. 2018 Nov 14;13(11):e0207428.

Engel HJ, Tatebe S, Alonzo PB, Mustille RL, Rivera MJ. Physical therapist-established intensive care unit early mobilization program: quality improvement project for critical care at the University of California San Francisco Medical Center. Phys Ther. 2013 Jul;93(7):975-85.

Fossat G, Baudin F, Courtes L, Bobet S, Dupont A, Bretagnol A, Benzekri-Lefèvre D, Kamel T, Muller G, Bercault N, Barbier F, Runge I, Nay MA, Skarzynski M, Mathonnet A, Boulain T.ffect of In-Bed Leg Cycling and Electrical Stimulation of the Quadriceps on Global Muscle Strength in Critically Ill Adults: A Randomized Clinical Trial. JAMA. 2018 Jul 24;320(4):368-378.

Hanekom S, Gosselink R, Dean E, van Aswegen H, Roos R, Ambrosino N, Louw Q. The development of a clinical management algorithm for early physical activity and mobilization of critically ill patients: synthesis of evidence and expert opinion and its translation into practice. Clin Rehabil. 2011 Sep;25(9):771-87.

Hickmann CE, Castanares-Zapatero D, Deldicque L, van den Bergh P, Caty G, Robert A, Roeseler J, Francaux M, Laterre P-F. Impact of very early physical therapy during septic shock on skeletal muscle: a randomized controlled trial. Critical Care Medicine 2018 Sep;46(9):1436-1443.

Hodgson CL, Bailey M, Bellomo R, Berney S, Buhr H, Denehy L, Gabbe B, Harrold M, Higgins A, Iwashyna TJ, Papworth R, Parke R, Patman S, Presneill J, Saxena M, Skinner E, Tipping C, Young P, Webb S; Trial of Early Activity and Mobilization Study Investigators. A Binational Multicenter Pilot Feasibility Randomized Controlled Trial of Early Goal-Directed Mobilization in the ICU.Crit Care Med. 2016 Jun;44(6):1145-52.

Johnson JK, Lohse B, Bento HA, Noren CS, Marcus RL, Tonna JE.Improving Outcomes for Critically Ill Cardiovascular Patients Through Increased Physical Therapy Staffing.Arch Phys Med Rehabil. 2019 Feb;100(2):270-277.e1

Kho ME, Molloy AJ, Clarke F, Herridge MS, Koo KK, Rudkowski J, Seely AJ, Pellizzari JR, Tarride JE, Mourtzakis M, Karachi T, Cook DJ; Canadian Critical Care Trials Group. CYCLE pilot: a protocol for a pilot randomised study of early cycle ergometry versus routine physiotherapy in mechanically ventilated patients. BMJ Open. 2016 Apr 8;6(4):e011659

Kimawi I, Lamberjack B, Nelliot A, Toonstra AL, Zanni J, Huang M, Mantheiy E, Kho ME, Needham DM.Safety and Feasibility of a Protocolized Approach to In-Bed Cycling Exercise in the Intensive Care Unit: Quality Improvement Project.Phys Ther. 2017 Jun 1;97(6):593-602

Mah JW, Staff I, Fichandler D, Butler KL.Resource-efficient mobilization programs in the intensive care unit: who stands to win?Am J Surg. 2013 Oct;206(4):488-93

McWilliams D, Atkins G, Hodson J, Snelson C. The Sara Combilizer® as an early mobilisation aid for critically ill patients: A prospective before and after study. Aust Crit Care. 2017 Jul;30(4):189-195.

McWilliams D, Weblin J, Atkins G, Bion J, Williams J, Elliott C, Whitehouse T, Snelson C. Enhancing rehabilitation of mechanically ventilated patients in the intensive care unit: a quality improvement project.J Crit Care. 2015 Feb;30(1):13-8

Morris PE, Goad A, Thompson C, Taylor K, Harry B, Passmore L, Ross A, Anderson L, Baker S, Sanchez M, Penley L, Howard A, Dixon L, Leach S, Small R, Hite RD, Haponik E. Early intensive care unit mobility therapy in the treatment of acute respiratory failure. Crit Care Med. 2008 Aug;36(8):2238-43.

Moyer M, Young B, Wilensky EM, Borst J, Pino W, Hart M, LoBreglio J, Zaleski D, Leonor I, Kung D, Smith M, Zager E, Grady MS, Kumar M.Implementation of an Early Mobility Pathway in Neurointensive Care Unit Patients With External Ventricular Devices.J Neurosci Nurs. 2017 Apr;49(2):102-107.

Negro, A., Cabrini, L„ Lembo, R., Monti, G., Dossi, M„ Perduca, A., Colombo, S„ Marazzi, M., Villa, G., Manara, D„ Landoni, G„ & Zangrillo, A. (2018). Early progressive mobilization in the intensive care unit without dedicated personnel. Canadian Journal of Critical Care Nursing, 29(3), 26-31.

Olkowski BF, Devine MA, Slotnick LE, Veznedaroglu E, Liebman KM, Arcaro ML, Binning MJ. Safety and feasibility of an early mobilization program for patients with aneurysmal subarachnoid hemorrhage. Phys Ther. 2013

Perme C, Chandrashekar R. Early mobility and walking program for patients in intensive care units: creating a standard of care. Am J Crit Care. 2009 May;18(3):212-21.

Pohlman MC, Schweickert WD, Pohlman AS, Nigos C, Pawlik AJ, Esbrook CL, Spears L, Miller M, Franczyk M, Deprizio D, Schmidt GA, Bowman A, Barr R, McCallister K, Hall JB, Kress JP. Feasibility of physical and occupational therapy beginning from initiation of mechanical ventilation. Crit Care Med. 2010 Nov;38(11):2089-94.

Ragland C, Ochoa L, Hartjes T. Early mobilisation in intensive care during renal replacement therapy: A quality improvement project. Intensive Crit Care Nurs. 2019 Jun; 52:22-27

Sarfati C, Moore A, Pilorge C, Amaru P, Mendialdua P, Rodet E, Stephan F, Rezaiguia-Delclaux S. Efficacy of early passive tilting in minimizing ICU-acquired weakness: a randomized controlled trial [with consumer summary. Journal of Critical Care 2018 Aug;46:37-43.

Schujmann DS, Lunardi AC, Fu C. Progressive mobility program and technology to increase the level of physical activity and its benefits in respiratory, muscular system, and functionality of ICU patients: study protocol for a randomized controlled trial. Trials. 2018 May 10;19(1):274.

Thomas K, Wright SE, Watson G, Baker C, Stafford V, Wade C, Chadwick TJ, Mansfield L, Wilkinson J, Shen J, Deverill M, Bonner S, Hugill K, Howard P, Henderson A, Roy A, Furneval J, Baudouin SV. Extra Physiotherapy in Critical Care (EPICC) Trial Protocol: a randomised controlled trial of intensive versus standard physical rehabilitation therapy in the critically ill. BMJ Open. 2015 May 25;5(5):e008035
